# Supplementary material for: Incorporation of Nonmetal Group Dopants into g-C3N4 Framework for Highly Improved Photocatalytic H2 Production
Source: MDPI journal article supplement (doi:10.3390/nano11061480), 2021-06-03
Supplement: s1 [file s1]

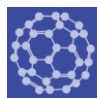

# Incorporation of Nonmetal Group Dopants into g-C<sub>3</sub>N<sub>4</sub> Framework for Highly Improved Photocatalytic H<sub>2</sub> Production

Weinan Xing <sup>1,2,3,\*</sup>, Ke Cheng <sup>1</sup>, Yichi Zhang <sup>1</sup>, Jie Ran <sup>1</sup> and Guangyu Wu <sup>1,3,4,\*</sup>

<sup>1</sup> College of Biology and the Environment, Co-Innovation Center for the Sustainable Forestry in Southern China, Nanjing Forestry University, Nanjing 210037, China; yichizhang2021@163.com (Y.Z.); hyiyi1232021@163.com (J.R.); email

<sup>2</sup> Key Laboratory of Advanced Energy Materials Chemistry (Ministry of Education), College of Chemistry, Nankai University, Tianjin 300071, China

<sup>3</sup> Key Laboratory of Functional Molecular Solids, Ministry of Education, Anhui Normal University, Wuhu 241000, China

<sup>4</sup> Jiangsu Provincial Key Laboratory of Palygorskite Science and Applied Technology, Huaiyin Institute of Technology, Huaian 223003, China

\* Correspondence: xingwn@njfu.edu.cn (W.X.); gywuchem@njfu.edu.cn (G.W.)

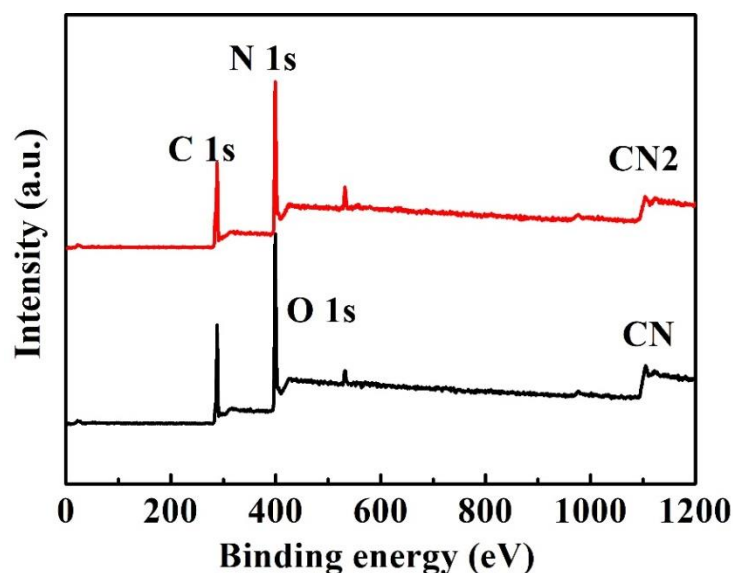

Figure S1. XPS survey spectra of CN and CN-2.

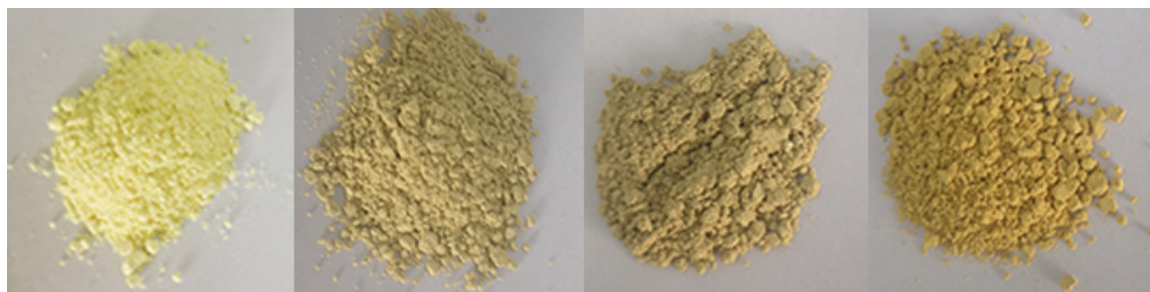

Figure S2. Digital images of CN, CN-1, CN-2 and CN-3.

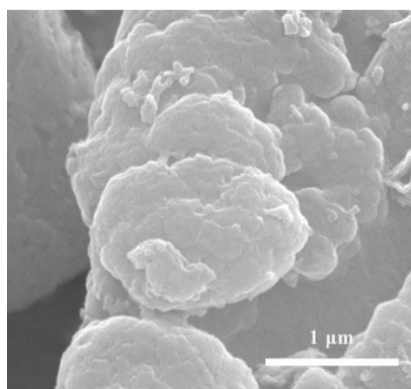

**Figure S3.** SEM image of CN.

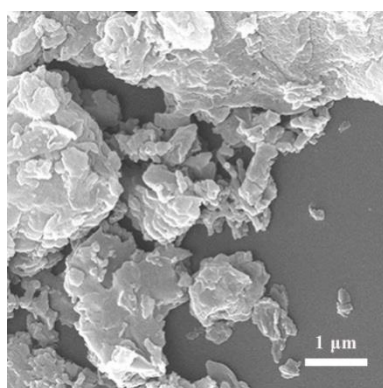

**Figure S4.** SEM image of CN-1.

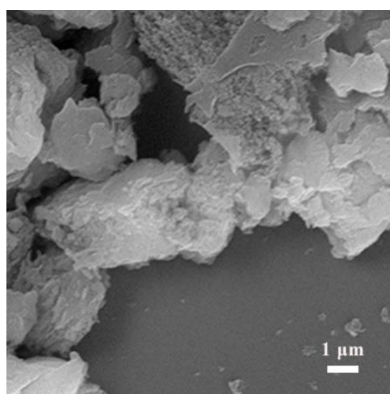

**Figure S5.** SEM image of CN-2.

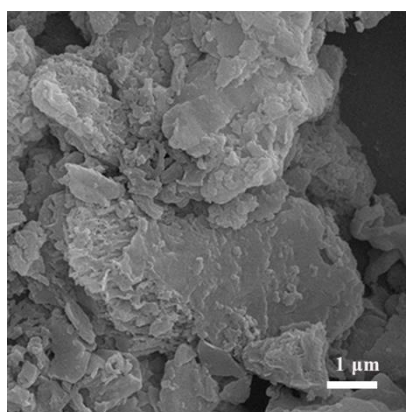

**Figure S6.** SEM image of CN-3.

**Table S1.** Elemental analysis of C and N content (wt.%) in CN, CN-1, CN-2 and CN-3.

| Sample | N wt.% | C wt.% | C/N  |
|--------|--------|--------|------|
| CN     | 55.65  | 42.40  | 0.76 |
| CN-1   | 53.59  | 43.32  | 0.81 |
| CN-2   | 54.06  | 44.53  | 0.82 |
| CN-3   | 53.81  | 44.47  | 0.83 |

**Table S2.** BET surface area and H<sub>2</sub> production rate of CN and CN-2 samples.

| Sample | BET surface area (m <sup>2</sup> g <sup>-1</sup> ) | H <sub>2</sub> production rate (μmol h <sup>-1</sup> g <sup>-1</sup> ) |
|--------|----------------------------------------------------|------------------------------------------------------------------------|
| CN     | 5.26                                               | 101.2                                                                  |
| CN-2   | 22.74                                              | 830                                                                    |

**Table 3.** Hydrogen evolution of CN-2 and comparison with other reported g-C<sub>3</sub>N<sub>4</sub> photocatalyst.

| Sample                                           | Light     | H <sub>2</sub> evolution (μmol h <sup>-1</sup> ) | Ref.      |
|--------------------------------------------------|-----------|--------------------------------------------------|-----------|
| CN-2                                             | λ >400 nm | 830                                              | This work |
| g-C <sub>3</sub> N <sub>4</sub> nanosheets       | λ >420 nm | 230                                              | [1]       |
| g-C <sub>3</sub> N <sub>4</sub> /C <sub>60</sub> | λ >420 nm | 266                                              | [2]       |
| PAN/ g-C <sub>3</sub> N <sub>4</sub>             | λ >400 nm | 370                                              | [3]       |
| S doped g-C <sub>3</sub> N <sub>4</sub>          | λ >420 nm | 525                                              | [4]       |
| C bridged g-C <sub>3</sub> N <sub>4</sub>        | λ >420 nm | 529                                              | [5]       |
| Cl doped g-C <sub>3</sub> N <sub>4</sub>         | λ >420 nm | 537                                              | [6]       |

## References

1. Xu, J.; Zhang, L. W. Shi, R.; Zhu, Y. F. Chemical exfoliation of graphitic carbon nitride for efficient heterogeneous photocatalysis. *J Mater Chem A* **2013**, *1*, 14766–14772.
2. Chen, X.; Chen, H.; Guan, L. J.; Zhen, J. M.; Sun, Z. J.; Du, P. W.; Lu, Y. L.; Yang, S. F. A facile mechanochemical route to covalently bonded graphitic carbon nitride (g-C<sub>3</sub>N<sub>4</sub>) and fullerene hybrid toward enhanced visible light photocatalytic hydrogen production. *Nanoscale* **2017**, *9*, 5615–5623.
3. He, F.; Chen, G.; Yu, Y. G.; Hao, S.; Zhou, Y. S.; Zheng, Y. Facile approach to synthesize g-PAN/g-C<sub>3</sub>N<sub>4</sub> composites with enhanced photocatalytic H<sub>2</sub> evolution activity. *ACS Appl Mater Inter* **2014**, *6*, 7171–7179.
4. Yang, C.; Zhang, S. S.; Huang, Y.; Lv, K. L.; Fang, S.; Wu, X. F.; Li, Q.; Fan, J. J. Sharply increasing the visible photoreactivity of g-C<sub>3</sub>N<sub>4</sub> by breaking the intralayered hydrogen bonds. *Appl Surf Sci* **2020**, *505*, 144654.

- 
5. Li, H.L.; Li, F.P.; Wang, Z.Y.; Jiao, Y.C.; Liu, Y.Y.; Wang, P.X.; Zhang, Y.; Qin, X.Y.; Dai, Y.; Huang, B.B. Fabrication of carbon bridged g-C<sub>3</sub>N<sub>4</sub> through supramolecular self-assembly for enhanced photocatalytic hydrogen evolution. *Appl Catal B-Environ* **2018**, *229*, 114–120.
  6. Liu, C.Y.; Zhang, Y. H.; Dong, F.; Reshak, A.H.; Ye, L.Q.; Pinna, N.; Zeng, C.; Zhang, T.R.; Huang, H.W. Chlorine intercalation in graphitic carbon nitride for efficient photocatalysis. *Appl Catal B-Environ* **2017**, *203*, 465–474.
